# Supplementary material
Source: PubMed Central journal article supplement (PMC5065656)
Supplement: mmc1.pdf [file mmc1.pdf]

**The American Journal of Human Genetics, Volume 99**

**Supplemental Data**

**GWIS: Genome-Wide Inferred Statistics  
for Functions of Multiple Phenotypes**

**Harold A. Nieuwboer, René Pool, Conor V. Dolan, Dorret I. Boomsma, and Michel G. Nivard**

**Table S1. False positive GWIS signals for male height**

| <b>Rs-ID</b> | <b>GWIS Beta</b> | <b>GWIS S.E.</b> | <b>GWIS p-value</b> | <b>GWAS Beta</b> | <b>GWAS S.E.</b> | <b>GWAS p-value</b> | <b>N</b> |
|--------------|------------------|------------------|---------------------|------------------|------------------|---------------------|----------|
| rs4649957    | -0,038239478     | 0,00687369       | 2,65E-08            | -0,037           | 0,0068           | 6,93E-08            | 58612,4  |
| rs4650139    | 0,03592988       | 0,006485556      | 3,02E-08            | 0,034            | 0,0065           | 1,21E-07            | 58611,5  |
| rs7530496    | -0,035727994     | 0,006481955      | 3,55E-08            | -0,034           | 0,0065           | 1,69E-07            | 58504,2  |

Note: These SNPs do pass genome wide significance threshold in a GWIS but not in a GWAS.

**Table S1:** The table reports associations found in the BMI GWIS based on male height data which are not significant in the original BMI GWAS. Note the differences in effect sizes are minor and p-values are close to the significance threshold in both analyses.
